# Supplementary material for: Exchangeable proton ENDOR as a probe of the redox-active iron center in activated bleomycin and ferric bleomycin
Source: Royal Society of Chemistry journal article supplement (doi:10.1039/c7dt01354j), 2017-01-01
Supplement: c7dt01354j1.pdf [file c7dt01354j1.pdf]

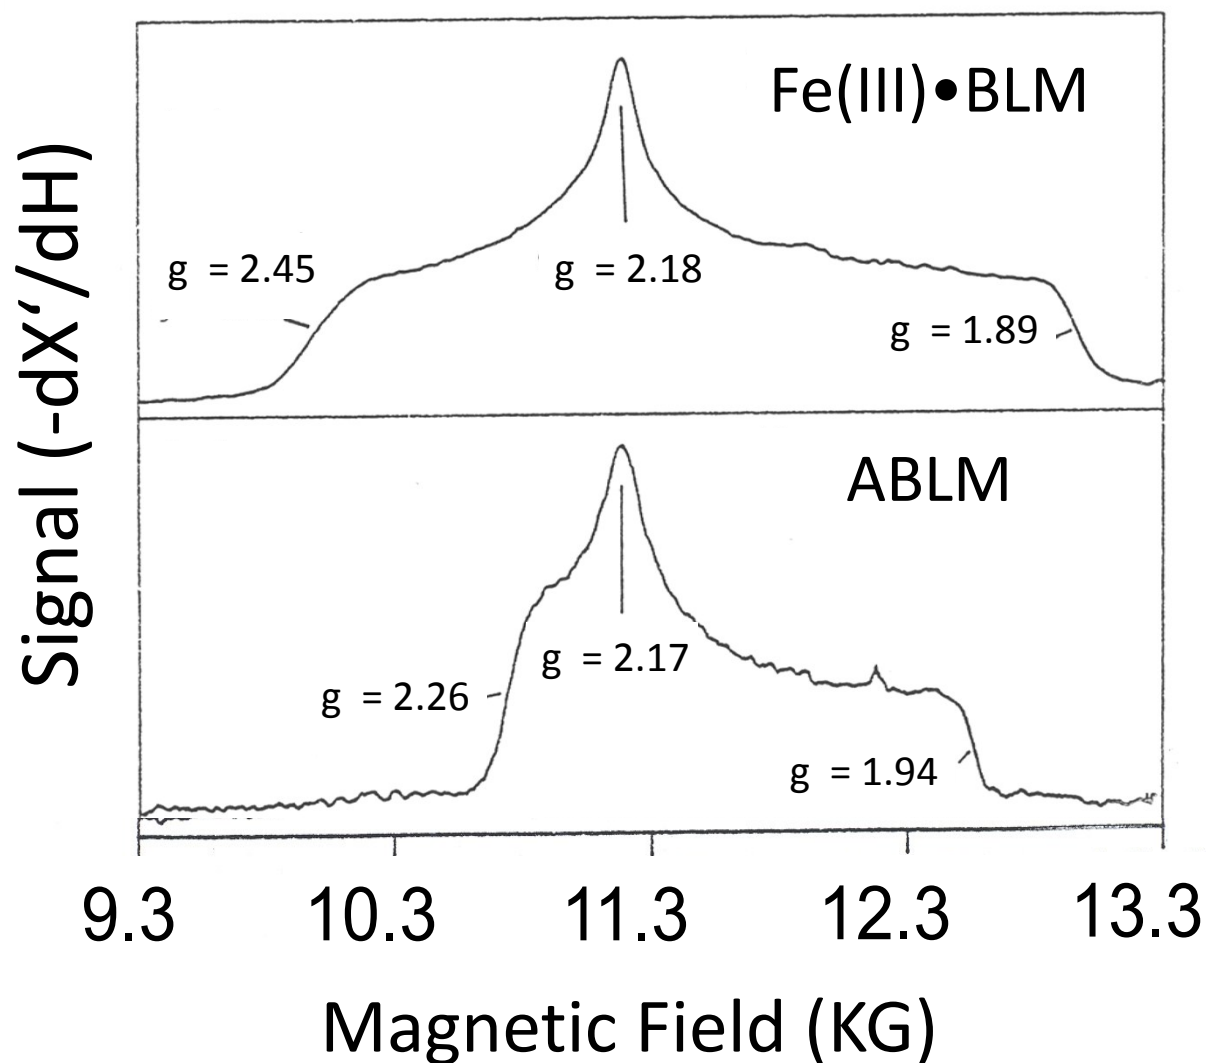

**Figure 1S.** This figure provides the dispersion, 100 KHz field-modulated, rapid-passage Q-band (34.1 GHz) EPR spectra from Fe(III)•BLM and ABLM. These spectra were obtained under the temperature and field modulation conditions of the present ENDOR measurements. The conditions were: temperature 2.0 K, 100 KHz field modulation ~2.2 G, and microwave power ~0.25  $\mu$ W (microwatts). In this adiabatic rapid passage condition, the electron spin relaxation is slow in comparison to the 10  $\mu$ s period of the 100 KHz field modulation.
